# Supplementary material for: Synergistic enhancement of chitosan/hyaluronate hydrogels via pH- triggered phase separation and Lysine crosslinking for potential biomedical applications
Source: Research Square preprint supplement (doi:10.21203/rs.3.rs-6662994/v1), 2025-11-20
Supplement: Supplementary file 1 [file 39320d5cfdcd6adfd5ec0177.docx]

Supplementary Information for

Synergistic enhancement of chitosan/hyaluronate hydrogels via pH-triggered phase separation and Lysine crosslinking for potential biomedical applicationsRuotong Ma1, Ziwei Hu1, Ting Wang1, Jie Tong1, Yu Wang1, Mariem Elmalkig1, Siyu Cheng1, Chungyang Wang3, Guangjun Nie124✉ 1 College of biological and food engineering, Anhui Polytechnic University, 241000 Wuhu, China 2 Wuhu Hight Biotechnology Co., Ltd, 241000 Wuhu, China3 College of Health and Human Sciences, Western Carolina University, Cullowhee, NC 28723, USA

4 Anhui Engineering Laboratory for Industrial Microbiology Molecular Breeding, 241000 Wuhu, China

Correspondence to: ngjason@ahpu.edu.cn (Guangjun Nie)

This PDF file includes:
Supplementary Table 1

Supplementary Table 2

Supplementary Table 3

Supplementary Table 4

It is regulated by the deacetylation and deprotonation of sodium hydroxide. Sodium hydroxide can deacetyl CS, and the increase of free amino groups (-NH₂) can reconstruct the hydrogen bond network, disrupt the ordered arrangement of chitosan and expand the crystal structure (increase the interfacial spacing d)**[1, 2]**. After adding 20% lysine, CrI at 10.4° significantly increased from the initial 2.67% (in HA40) to 3.6%, the CrI at 15.8° increased from 3.93% to 4.93%, and the CrI at 22.62° increased from 3.02% to 3.57%. The ε -amino functional group (-NH₂) of lysine participates in the cross-linking reaction, thereby increasing the intermolecular cross-linking density**[3]**.

**Supplementary Table 1** Peak analysis of XRD spectra of hydrogels

| Sample | Conditions | Peak | FWHM | CrI (%) |
| --- | --- | --- | --- | --- |
| HA20 | 20% HA/0.1 M NaOH | 10.28 | 2.06 | 1.89 |
| 15.80 | 3.14 | 4.36 |
| 20.04 | 0.72 | 0.13 |
| 22.61 | 1.63 | 3.78 |
| 26.73 | 0.23 | 0.15 |
| HA60 | 60% HA/0.1 M NaOH | 8.85 | 0.18 | 0.07 |
| 10.51 | 1.83 | 1.22 |
| 16.04 | 2.64 | 0.54 |
| 19.97 | 1.40 | 1.32 |
| 22.67 | 1.32 | 1.84 |
| 26.74 | 0.24 | 0.09 |
| HA40 | 40% HA/0.1 M NaOH | 10.39 | 2.33 | 2.67 |
| 15.73 | 3.00 | 3.93 |
| 20.07 | 1.00 | 0.38 |
| 22.66 | 1.45 | 3.02 |
| 26.75 | 0.38 | 0.08 |
| 0.2 M | 40% HA/0.2 M NaOH | 10.38 | 2.22 | 3.81 |
| 15.75 | 3.01 | 3.19 |
| 19.97 | 1.09 | 0.37 |
| 22.65 | 1.44 | 2.65 |
| 26.74 | 0.24 | 0.08 |
| 0.7 M | 40% HA/0.7 M NaOH | 10.40 | 2.25 | 6.81 |
| 15.71 | 2.88 | 2.85 |
| 19.99 | 1.03 | 0.42 |
| 22.66 | 1.45 | 2.79 |
| 26.74 | 0.27 | 0.09 |
| Lys | 40% HA/0.1 M NaOH/20% Lys | 10.31 | 2.20 | 3.60 |
| 15.74 | 3.13 | 4.93 |
| 22.62 | 1.57 | 3.57 |
| 20.00 | 0.85 | 0.18 |
| 26.73 | 0.27 | 0.09 |

**Supplementary Table 2:** Tdm and IAWL analyses of hydrogels within the range of 30-500℃

| Sample | Temperature range (℃) |  | Tdm | IAWL |
| --- | --- | --- | --- | --- |
| HA20 | 30-190 |  | 130 | 28.36 |
| 190-400 |  | 265 | 326.18 |
| 400-500 |  | 457 | 3.11 |
| HA60 | 30-190 |  | 93 | 58.11 |
| 190-400 |  | 253 | 349.45 |
| 400-500 |  | 453 | 2.31 |
| HA40 | 30-190 |  | 109 | 48.66 |
| 190-400 |  | 256 | 343.01 |
| 400-500 |  | 449 | 1.57 |
| 0.2 M | 30-190 |  | 111 | 47.88 |
| 190-400 |  | 254 | 331.86 |
| 400-500 |  | 455 | 3.24 |
| 0.7 M | 30-190 |  | 119 | 30.38 |
| 190-400 |  | 256 | 340.52 |
| 400-500 |  | 456 | 3.73 |
| Lys | 30-190 |  | 103 | 45.21 |
| 190-400 |  | 256 | 357.65 |
| 400-500 |  | 468 | 2.62 |

**Supplementary Table 3** Peak analysis of FTIR spectra of hydrogels in the range of 3000-4000 cm-1

| Sample | Peak No. | Wavenumber (cm-1) | FWHM | Hight | RIA (%) | Note |
| --- | --- | --- | --- | --- | --- | --- |
| 0.1 M | 1 | 3118 | 140.07 | 8.76 | 5.61 | Protonated -NH2 |
| 2 | 3281 | 248.93 | 29.29 | 33.83 | Inter H-bond |
| 3 | 3504 | 256.72 | 43.64 | 52.15 | Bonded -OH |
| 4 | 3612 | 109.16 | 16.55 | 8.41 | Unbonded -OH |
| 0.2 M | 1 | 3109 | 134.55 | 8.99 | 5.07 | Protonated -NH2 |
| 2 | 3267 | 250.44 | 31.70 | 33.87 | Inter H-bond |
| 3 | 3495 | 263.91 | 46.20 | 52.27 | Bonded -OH |
| 4 | 3610 | 117.60 | 17.43 | 8.79 | Unbonded -OH |
| 0.7 M | 1 | 3244 | 300.52 | 26.00 | 33.40 | Inter H-bond |
| 2 | 3505 | 286.68 | 44.17 | 55.39 | Bonded -OH |
| 3 | 3620 | 118.73 | 21.60 | 11.22 | Unbonded -OH |
| Lys | 1 | 3252 | 302.22 | 31.21 | 39.49 | Inter H-bond |
| 2 | 3487 | 251.12 | 43.99 | 47.21 | Bonded -OH |
| 3 | 3606 | 123.32 | 25.26 | 13.31 | Unbonded -OH |

**Supplementary Table 4** Peak analysis of FTIR spectra of hydrogels in the range of 1250-1900 cm-1

| Sample | Peak No. | Wavenumber (cm-1) | FWHM | Hight | RIA (%) | Note |
| --- | --- | --- | --- | --- | --- | --- |
| 0.1M | 1 | 1321 | 56.11 | 12.70 | 6.42 | Amide III |
| 2 | 1377 | 43.42 | 16.23 | 6.36 |  |
| 3 | 1423 | 52.98 | 22.69 | 10.85 | -COOH/-COO- |
| 4 | 1463 | 30.26 | 9.61 | 2.62 |  |
| 5 | 1570 | 74.19 | 21.08 | 14.11 | Amide II |
| 6 | 1660 | 126.81 | 49.63 | 56.78 | Amide I |
| 7 | 1777 | 82.03 | 3.88 | 2.87 |  |
| 0.2 M | 1 | 1322 | 59.85 | 17.79 | 8.25 | Amide III |
| 2 | 1375 | 37.82 | 18.72 | 5.49 |  |
| 3 | 1419 | 58.06 | 30.14 | 13.58 | -COOH/-COO- |
| 4 | 1463 | 33.00 | 11.25 | 2.88 |  |
| 5 | 1550 | 41.88 | 21.15 | 6.88 | Amide II |
| 6 | 1591 | 51.21 | 19.52 | 7.76 |  |
| 7 | 1656 | 122.75 | 57.90 | 55.16 | Amide I |
| 0.7 M | 1 | 1323 | 59.96 | 11.94 | 6.15 | Amide III |
| 2 | 1377 | 42.61 | 13.75 | 5.03 |  |
| 3 | 1423 | 55.66 | 19.63 | 9.39 | -COOH/-COO- |
| 4 | 1465 | 32.12 | 9.29 | 2.56 |  |
| 5 | 1547 | 36.28 | 11.78 | 3.67 | Amide II |
| 6 | 1585 | 56.07 | 13.66 | 6.58 |  |
| 7 | 1664 | 147.24 | 52.67 | 66.62 | Amide I |
| Lys | 1 | 1322 | 56.86 | 13.59 | 6.91 | Amide III |
| 2 | 1376 | 40.45 | 16.10 | 5.83 |  |
| 3 | 1422 | 55.63 | 22.87 | 11.39 | -COOH/-COO- |
| 4 | 1464 | 31.83 | 9.45 | 2.69 |  |
| 5 | 1549 | 41.70 | 16.82 | 6.28 | Amide II |
| 6 | 1589 | 51.41 | 17.26 | 7.94 |  |
| 7 | 1657 | 123.32 | 53.38 | 58.95 | Amide I |

**References**1. Fan M, Hu Q, Shen K. (2009) Preparation and structure of chitosan soluble in wide pH range. Carbohydrate Polymers.78(1):66-71.<https://doi.org/10.1016/j.carbpol.2009.03.031>.

2. Mishra A, Omoyeni T, Singh PK, et al. (2024) Trends in sustainable chitosan-based hydrogel technology for circular biomedical engineering: A review. Int J Biol Macromol.276(Pt 1):133823.<https://doi.org/10.1016/j.ijbiomac.2024.133823>.

3. Hu M, Yang J, Xu J. (2021) Structural and biological investigation of chitosan/hyaluronic acid with silanized-hydroxypropyl methylcellulose as an injectable reinforced interpenetrating network hydrogel for cartilage tissue engineering. Drug delivery.28(1):607-19.<https://doi.org/10.1080/10717544.2021.1895906>.
